# Supplementary material for: A novel electrochemical sensor for the determination of lidocaine based on surface-imprinting on porous three-dimensional film
Source: Royal Society of Chemistry journal article supplement (doi:10.1039/c4tc02039a), 2014-10-15
Supplement: c4tc02039a1.pdf [file c4tc02039a1.pdf]

## Electronic Supplementary Information

### **Novel electrochemical sensor for the determination of lidocaine based on surface-imprinting on porous three-dimensional film**

Guangming Yang,<sup>a,b</sup> and Faqiong Zhao<sup>a\*</sup>

<sup>a</sup> Key Laboratory of Analytical Chemistry for Biology and Medicine (Ministry of Education), College of Chemistry and Molecular Sciences, Wuhan University, Wuhan, Hubei, 400372, China, Fax: (+86)68752701, E-mail: [fqzhao@whu.edu.cn](mailto:fqzhao@whu.edu.cn)

<sup>b</sup> Department of Resources and Environment, Baoshan University, Bao shan, Yunnan, 678000, China

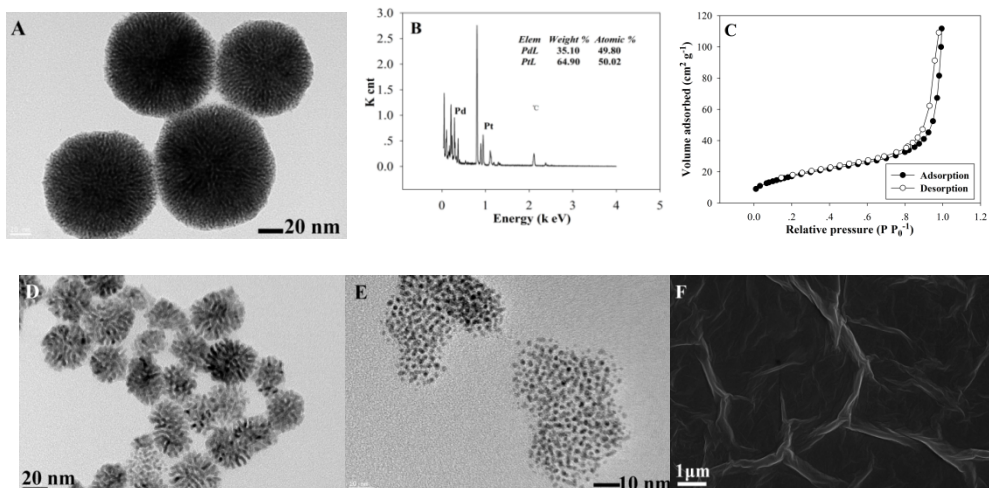

**Fig. S1** The high-magnification TEM image of the dendritic Pd-Pt bimetallic nanoparticles (A), energy dispersive spectrum of the dendritic Pd-Pt bimetallic nanoparticles (B), The Brunauer-Emmett-Teller (BET) measurement of dendritic Pd-Pt bimetallic nanoparticles (C), high-magnification TEM image of dendritic Pd nanoparticles (D) and porous Pt nanonetworks (Pt NWs) (E), and the SEM image of carboxyl-graphene (COOH-r-GO) modified glassy carbon electrode (GCE) (F).

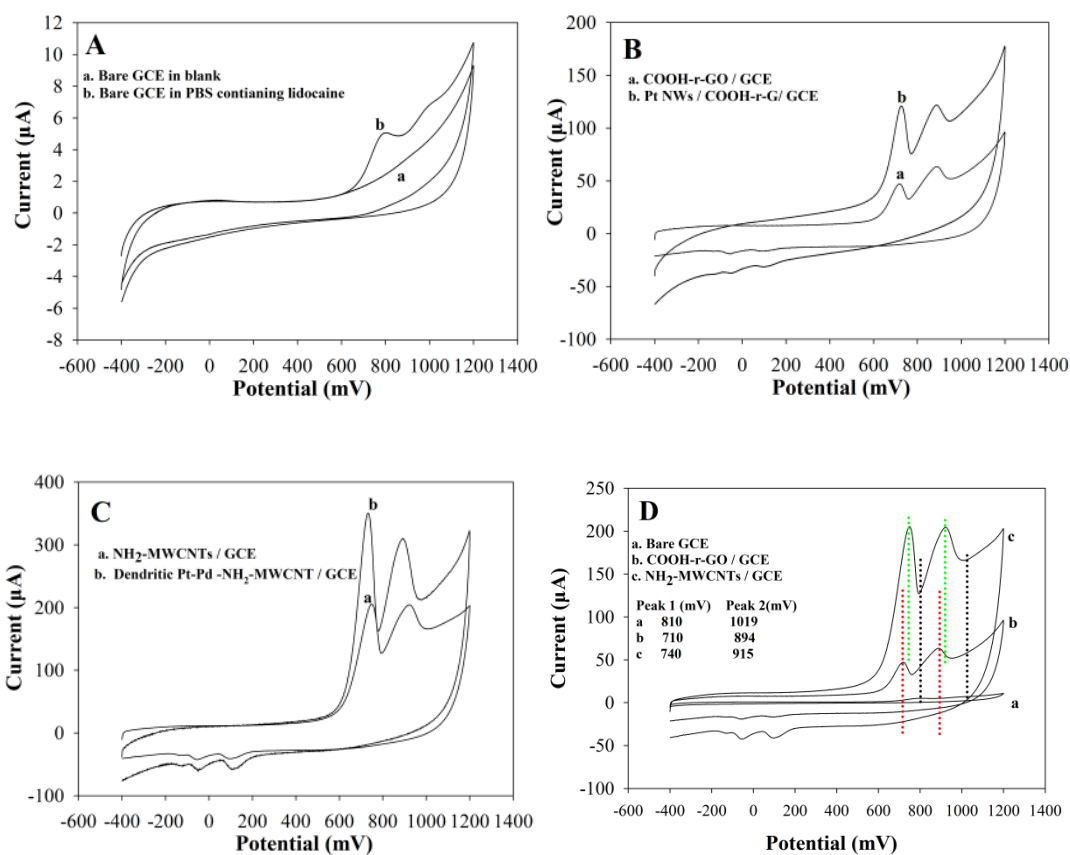

**Fig. 2S** (A) CVs of bare GCE in blank PBS (pH= 7.5) (a) and PBS +  $1.0 \times 10^{-5}$  mol L<sup>-1</sup> lidocaine;  
 (B) CVs of COOH-r-GO / GCE and Pt NWs / COOH-r-GO / GCE in PBS containing  $1.0 \times 10^{-5}$  mol L<sup>-1</sup> lidocaine;  
 (C) CVs of NH<sub>2</sub>-MWCNTs / GCE and dendritic Pt-Pd bimetallic nanoparticles-NH<sub>2</sub>-MWCNTs / COOH-r-GO / GCE in PBS containing  $1.0 \times 10^{-5}$  mol L<sup>-1</sup> lidocaine.  
 (D) CVs of bare GCE, COOH-r-GO / GCE and NH<sub>2</sub>-MWCNTs / GCE in PBS containing  $1.0 \times 10^{-5}$  mol L<sup>-1</sup> lidocaine.

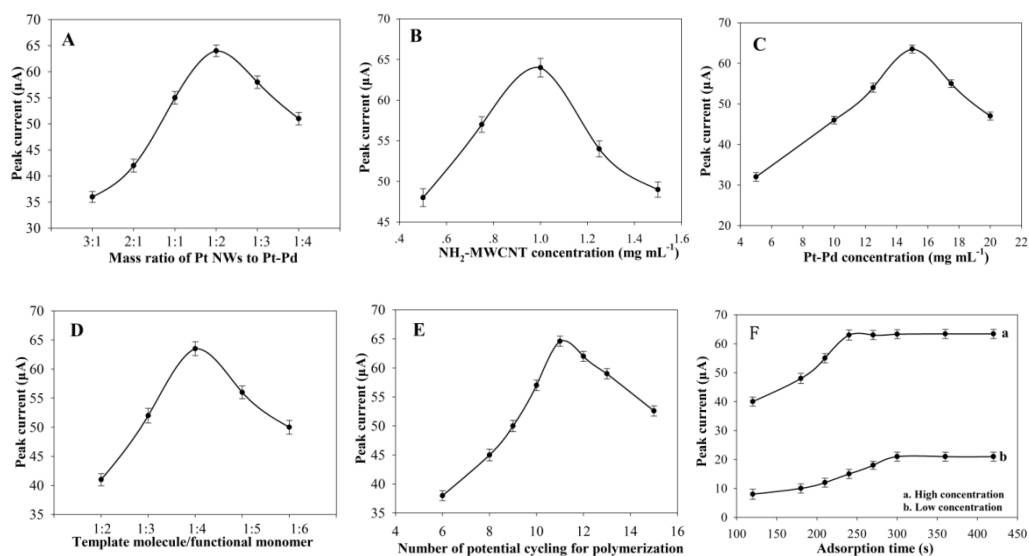

**Fig. S3** Influence of different factors on the peak current of  $1.0 \times 10^{-6}$  mol L<sup>-1</sup> lidocaine (A to F) in PBS (pH= 7.5). All error bars represent SD (n= 3). (A) Mass ratio of Pt NWs to dendritic Pt-Pd bimetallic NPs; (B) concentration of NH<sub>2</sub>-MWCNT; (C) concentration of dendritic Pt-Pd bimetallic NPs; (D) ratio of template molecule to functional monomer; (E) electrochemical polymerization time; (F) adsorption time (a:  $1.0 \times 10^{-6}$  mol L<sup>-1</sup>; b:  $1.0 \times 10^{-9}$  mol L<sup>-1</sup> lidocaine).

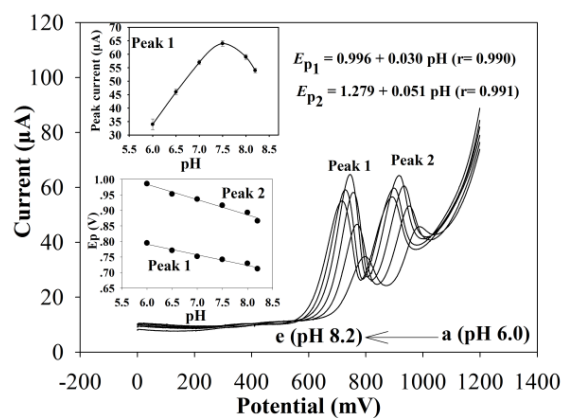

**Fig. S4** DPVs of the MIP sensor in  $1.0 \times 10^{-6}$  mol L<sup>-1</sup> lidocaine solutions with different pH. Inset: effects of solution pH on peak current and on peak potential of  $1.0 \times 10^{-6}$  mol L<sup>-1</sup> lidocaine. Error bars represent SD (n=3). Other conditions as in Fig. S3.

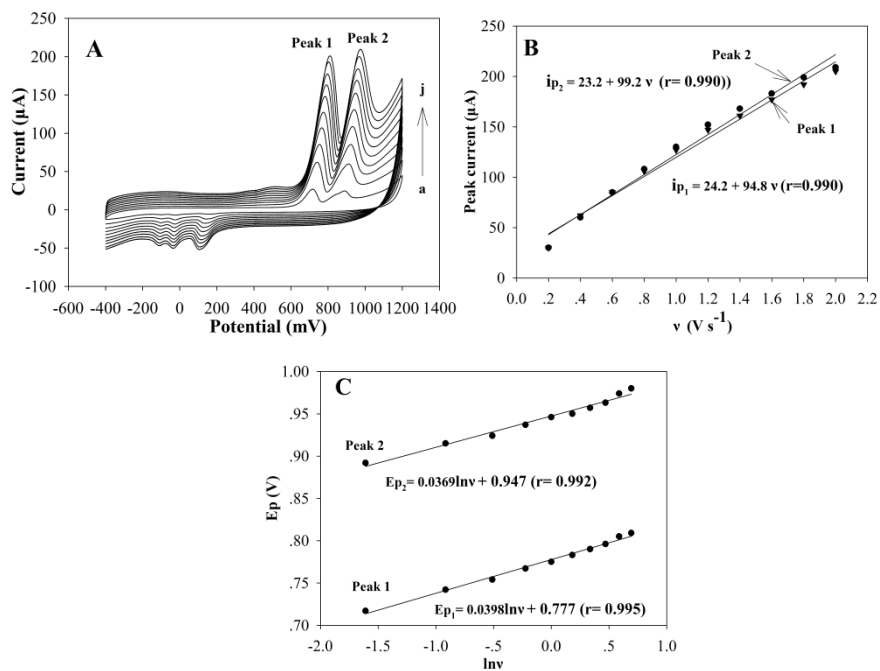

**Fig. S5** (A) CVs of MIP sensors (I) at different scan rate in PBS (pH= 7.5) after binding lidocaine in  $1.0 \times 10^{-6}$  mol L<sup>-1</sup> lidocaine. Scan rate (a to j): 20 to 200 mV s<sup>-1</sup>;  
 (B) Effect of scan rate on peak current after binding lidocaine in  $1.0 \times 10^{-6}$  mol L<sup>-1</sup> lidocaine;  
 (C) Effect of scan rate on peak potential after binding lidocaine in  $1.0 \times 10^{-6}$  mol L<sup>-1</sup> lidocaine. Other conditions as in Fig. S3.

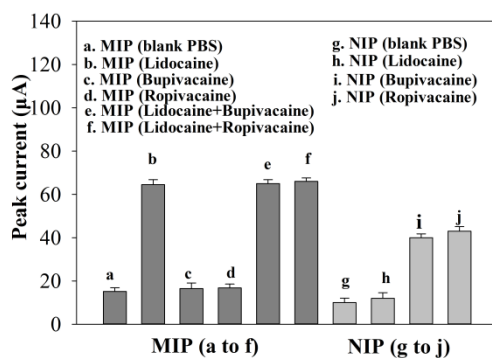

**Fig. S6** Influence of similar compounds on the peak current of lidocaine in PBS (pH= 7.5) under optimal experimental conditions. Other conditions as in Fig. S3. Error bars represent SD (n=3). Solution composition for MIP sensor detection: (a) 0 mol L<sup>-1</sup> lidocaine, (b) 1.0 × 10<sup>-6</sup> mol L<sup>-1</sup> lidocaine, (c) 2.0 × 10<sup>-5</sup> mol L<sup>-1</sup> ropivacaine, (d) 2.0 × 10<sup>-5</sup> mol L<sup>-1</sup> bupivacaine, (e) b + 2.0 × 10<sup>-5</sup> mol L<sup>-1</sup> ropivacaine and (f) b + 2.0 × 10<sup>-5</sup> mol L<sup>-1</sup> bupivacaine; Solution composition for NIP sensor detection: (g) 0 mol L<sup>-1</sup> lidocaine, (h) 1.0 × 10<sup>-6</sup> mol L<sup>-1</sup> lidocaine, (i) 2.0 × 10<sup>-5</sup> mol L<sup>-1</sup> ropivacaine and (j) 2.0 × 10<sup>-5</sup> mol L<sup>-1</sup> bupivacaine.
